# Supplementary material
Source: HighWire-hosted journal article supplement (https://cmaj.ca/highwire/filestream/77357/field_highwire_adjunct_files/0/190796-res-1-at.pdf)
Supplement: 190796-res-1-at.pdf [file 190796-res-1-at.pdf]

## Appendix 1 (as submitted by the authors): Supplementary Tables and Figures

**Table S1. Summary of databases used in the study.**

| <b>Dataset</b>                                      | <b>Type of Data</b>                                              | <b>Role in Study</b>                                                                                                                                                |
|-----------------------------------------------------|------------------------------------------------------------------|---------------------------------------------------------------------------------------------------------------------------------------------------------------------|
| Canadian Community Health Survey                    | Statistics Canada survey                                         | Used to calculate mean Health Utility Index Mark 3 (HUI) among people with and without IBD in 2000 (Cycle 1.1) and 2008 (2009/2010)                                 |
| CIHI Discharge Abstract Database (DAD)              | Health administrative data                                       | Hospitalizations; used in algorithm to identify people with IBD (OCCC)                                                                                              |
| CIHI National Ambulatory Care Classification System | Health administrative data                                       | Emergency department visits; used in algorithm to identify people with IBD (OCCC)                                                                                   |
| National Population Health Survey                   | Statistics Canada survey                                         | Used to calculate mean Health Utility Index Mark 3 (HUI) among people with and without IBD in 1996                                                                  |
| OHIP physician claims database                      | Health administrative data                                       | Outpatient visits; used in algorithm to identify people with IBD (OCCC)                                                                                             |
| Ontario Crohn's and Colitis Cohort (OCCC)           | Validated disease cohort derived from health administrative data | Cohort of all people living with IBD in Ontario; derived from health administrative data housed at ICES                                                             |
| Ontario Drug Benefit database                       | Health administrative data                                       | Prescription information for individuals $\geq 65$ years; used in algorithm to identify people $\geq 65$ years with IBD (OCCC)                                      |
| Registered Person Database                          | Population data                                                  | Provided demographic characteristics (including mean neighbourhood income quintile and rural/urban household) used in matching people with IBD to those without IBD |
| Vital Statistics                                    | Population data                                                  | Used to identify date of death among people with and without IBD                                                                                                    |

Abbreviations: CIHI, Canadian Institute for Health Information; IBD, inflammatory bowel disease; OCCC, Ontario Crohn's and Colitis Cohort; OHIP, Ontario Health Insurance Plan

**Table S2. Validated age-specific algorithms used to identify people with inflammatory bowel disease. Health care contacts (visits and hospitalizations) represent those associated with diagnostic code for IBD (ICD-9: 555.x, 556.x; ICD-10: K50.x, K51),**

|                                                                | Pediatric (<18 years) (1)                                                                                                                                                                                                                    | Adult (18-64 years) (2)                                                                                              | Elderly (≥65 years) (2)                                                                                                                                                                    |
|----------------------------------------------------------------|----------------------------------------------------------------------------------------------------------------------------------------------------------------------------------------------------------------------------------------------|----------------------------------------------------------------------------------------------------------------------|--------------------------------------------------------------------------------------------------------------------------------------------------------------------------------------------|
| Algorithm                                                      | <ul style="list-style-type: none"> <li>Underwent colonoscopy: 4 outpatient visits or 2 hospitalizations within 3 years<sup>a</sup></li> <li>Did not undergo colonoscopy: 7 outpatient visits or 3 hospitalizations within 3 years</li> </ul> | <ul style="list-style-type: none"> <li>5 outpatient visits or hospitalizations within 4 years<sup>a</sup></li> </ul> | <ul style="list-style-type: none"> <li>5 outpatient visits or hospitalizations within 4 years<sup>a</sup>, and</li> <li>At least one prescription for an IBD-related medication</li> </ul> |
| Accuracy of algorithm in the development (validation) cohort   | Sens: 89.6% (91.1%)<br>Spec: >99.9% (99.5%)<br>PPV: 59.2-75.2%<br>NPV: >99.9%                                                                                                                                                                | Sens: 76.8% (92.3%)<br>Spec: 96.2% (99.1%)<br>PPV: 81.4%<br>NPV: 95.0%                                               | Sens: 59.3% (78.3%)<br>Spec: 99.0% (98.2%)<br>PPV: 71.1%<br>NPV: 98.3%                                                                                                                     |
| Differentiation between Crohn's disease and ulcerative colitis | 5 of last 7 outpatient contacts                                                                                                                                                                                                              | 5 of last 9 outpatient contacts                                                                                      |                                                                                                                                                                                            |
|                                                                | Sens: 95.1%<br>Spec: 86.0%<br>PPV: 92.0%<br>NPV: 91.2%                                                                                                                                                                                       | Accuracy: 91.1%                                                                                                      |                                                                                                                                                                                            |

Abbreviations: IBD, inflammatory bowel disease; ICD, International Classification of Diseases; NPV, negative predictive value; PPV, positive predictive value; Sens, sensitivity; Spec, specificity

<sup>a</sup>People were identified as a case once they accumulated sufficient diagnostic codes for IBD within the specified window. Provided the first of these codes occurred prior to July 1, 1996, 2000, 2008, or 2011, the cases was included as a prevalent case of IBD in that year.

**Table S3. Characteristics of people with and without IBD who did and did not participate in a Statistics Canada survey. Differences in characteristics between those participating and not participating in a survey are expected based on survey design.**

|                                                   | NPHS (1996)       |                   | CCHS 1.1 (2000)   |                   | CCHS 2009/2010 (2008) |                   |
|---------------------------------------------------|-------------------|-------------------|-------------------|-------------------|-----------------------|-------------------|
|                                                   | Participant       | Non-Participant   | Participant       | Non-Participant   | Participant           | Non-Participant   |
| <b>People with IBD</b>                            |                   |                   |                   |                   |                       |                   |
| N                                                 | 88                | 32,730            | 158               | 44,443            | 238                   | 69,321            |
| <b>Age on July 1</b>                              |                   |                   |                   |                   |                       |                   |
| Mean $\pm$ sd                                     | 43.13 $\pm$ 16.81 | 42.40 $\pm$ 16.59 | 46.19 $\pm$ 17.79 | 44.21 $\pm$ 16.66 | 54.19 $\pm$ 17.16     | 47.31 $\pm$ 16.86 |
| Median (Q1-Q3)                                    | 39 (30-55)        | 40 (30-53)        | 43 (32-59)        | 42 (32-55)        | 54 (40-67)            | 46 (35-59)        |
| <b>Female Sex, n (%)</b>                          | 46 (52.3)         | 17,295 (52.8)     | 88 (55.7)         | 23,463 (52.8)     | 147 (61.8)            | 36,361 (52.5)     |
| <b>Rural*, n (%)</b>                              | 19 (21.6)         | 4,423 (13.5)      | 37 (23.4)         | 5,738 (12.9)      | 50 (21.0)             | 8,486 (12.2)      |
| <b>Mean neighbourhood income quintile*, n (%)</b> |                   |                   |                   |                   |                       |                   |
| Q1 (lowest)                                       | 19 (21.6)         | 5,407 (16.5)      | 37 (23.4)         | 7,174 (16.1)      | 46 (19.3)             | 11,036 (15.9)     |
| Q2                                                | 20 (22.7)         | 6,197 (18.9)      | 30 (19.0)         | 8,725 (19.6)      | 39 (16.4)             | 12,811 (18.5)     |
| Q3                                                | 14 (15.9)         | 6,797 (20.8)      | 32 (20.3)         | 9,184 (20.7)      | 48 (20.2)             | 14,061 (20.3)     |
| Q4                                                | 11 (12.5)         | 7,091 (21.7)      | 26 (16.5)         | 9,307 (20.9)      | 58 (24.4)             | 15,493 (22.3)     |
| Q5 (highest)                                      | 24 (27.3)         | 7,238 (22.1)      | 33 (20.9)         | 10,053 (22.6)     | 47 (19.7)             | 15,920 (23.0)     |
| <b>Type of IBD, n (%)</b>                         |                   |                   |                   |                   |                       |                   |
| Crohn's disease                                   | 42 (47.7)         | 16,762 (51.2)     | 95 (60.1)         | 22,158 (49.9)     | 119 (50.0)            | 33,292 (48.0)     |
| Ulcerative colitis or IBD-unclassified**          | 46 (52.3)         | 15,968 (48.8)     | 63 (39.9)         | 22,285 (50.1)     | 119 (50.0)            | 36,029 (52.0)     |
| <b>People without IBD</b>                         |                   |                   |                   |                   |                       |                   |
| N                                                 | 434               | 162,850           | 790               | 221,336           | 1176                  | 345,825           |
| <b>Age on July 1</b>                              |                   |                   |                   |                   |                       |                   |
| Mean $\pm$ sd                                     | 43.08 $\pm$ 16.35 | 42.28 $\pm$ 16.51 | 46.20 $\pm$ 17.76 | 44.10 $\pm$ 16.59 | 54.17 $\pm$ 17.01     | 47.25 $\pm$ 16.83 |
| Median (Q1-Q3)                                    | 39 (31-54)        | 40 (30-53)        | 43 (32-60)        | 42 (32-55)        | 55 (40-67)            | 46 (35-58)        |
| <b>Female Sex, n (%)</b>                          | 224 (51.6)        | 85,918 (52.8)     | 440 (55.7)        | 116,747 (52.7)    | 729 (62.0)            | 181,253 (52.4)    |
| <b>Rural*, n (%)</b>                              | 89 (20.5)         | 21,326 (13.1)     | 185 (23.4)        | 27,828 (12.6)     | 236 (20.1)            | 41,669 (12.0)     |
| <b>Mean neighbourhood income quintile*, n (%)</b> |                   |                   |                   |                   |                       |                   |
| Q1 (lowest)                                       | 92 (21.2)         | 26,854 (16.5)     | 185 (23.4)        | 35,672 (16.1)     | 224 (19.0)            | 55,026 (15.9)     |
| Q2                                                | 100 (23.0)        | 30,786 (18.9)     | 150 (19.0)        | 43,399 (19.6)     | 191 (16.2)            | 63,830 (18.5)     |
| Q3                                                | 70 (16.1)         | 33,828 (20.8)     | 160 (20.3)        | 45,750 (20.7)     | 240 (20.4)            | 70,189 (20.3)     |
| Q4                                                | 52 (12.0)         | 35,291 (21.7)     | 130 (16.5)        | 46,414 (21.0)     | 287 (24.4)            | 77,277 (22.3)     |
| Q5 (highest)                                      | 120 (27.6)        | 36,091 (22.2)     | 165 (20.9)        | 50,101 (22.6)     | 234 (19.9)            | 79,503 (23.0)     |

\*For survey respondents, rural/urban household and income quintile are as of date of survey completion; for non-respondents, rural/urban household and income quintile are as of July 1<sup>st</sup> of each given year. \*\*People with ulcerative colitis and IBD-unclassified were combined due to privacy regulations  
Abbreviations: CCHS, Canadian Community Health Survey; IBD, inflammatory bowel disease; NPHS, National Population Health Survey; Q1, first quartile; Q3, third quartile; sd, standard deviation

**Table S4. Comparison of life expectancy and health-adjusted life expectancy among females and males with Crohn's disease (CD) and matched people without CD. Significant differences are highlighted in bold font.**

|                         |                      | 1996                    |                       |                               | 2000                             |                       |                               | 2008                             |                       |                                | 2011 <sup>a</sup>                |                       |                                | Difference Over Time <sup>b</sup> |                            |                            |
|-------------------------|----------------------|-------------------------|-----------------------|-------------------------------|----------------------------------|-----------------------|-------------------------------|----------------------------------|-----------------------|--------------------------------|----------------------------------|-----------------------|--------------------------------|-----------------------------------|----------------------------|----------------------------|
|                         |                      | CD                      | Non-CD                | Difference                    | CD                               | Non-CD                | Difference                    | CD                               | Non-CD                | Difference                     | CD                               | Non-CD                | Difference                     | CD                                | Non-CD                     |                            |
| LE (95% CI)             | <b>Females</b>       | 74.5y<br>(73.3, 75.7)   | 82.1y<br>(81.5, 82.7) | <b>-7.6y<br/>(-8.9, -6.2)</b> | 75.1y<br>(74.2, 76.0)            | 83.6y<br>(83.0, 84.1) | <b>-8.5y<br/>(-9.6, -7.4)</b> | 76.4y<br>(75.6, 77.2)            | 86.2y<br>(85.7, 86.6) | <b>-9.8y<br/>(-10.7, -8.9)</b> | 76.3y<br>(75.3, 77.4)            | 85.8y<br>(85.4, 86.2) | <b>-9.5y<br/>(-10.6, -8.3)</b> | <b>1.8y<br/>(0.2, 3.4)</b>        | <b>3.7y<br/>(3.0, 4.4)</b> |                            |
|                         | <b>Males</b>         | 70.7y<br>(69.4, 72.0)   | 77.2y<br>(76.4, 77.9) | <b>-6.5y<br/>(-8.0, -4.9)</b> | 73.6y<br>(72.4, 74.7)            | 79.3y<br>(78.6, 80.0) | <b>-5.7y<br/>(-7.1, -4.4)</b> | 73.4y<br>(72.4, 74.3)            | 80.7y<br>(80.1, 81.3) | <b>-7.3y<br/>(-8.5, -6.2)</b>  | 73.8y<br>(72.8, 74.7)            | 81.2y<br>(80.8, 81.7) | <b>-7.5y<br/>(-8.5, -6.4)</b>  | <b>3.1y<br/>(1.4, 4.7)</b>        | <b>4.1y<br/>(3.2, 4.9)</b> |                            |
| HALE (95% CI)           | Overall              | <b>Females</b>          | 60.2y<br>(57.4, 63.1) | 74.9y<br>(73.4, 76.4)         | <b>-14.6y<br/>(-17.8, -11.4)</b> | 56.6y<br>(53.9, 59.3) | 71.5y<br>(69.8, 73.1)         | <b>-14.9y<br/>(-18.0, -11.7)</b> | 59.6y<br>(57.0, 62.2) | 73.9y<br>(72.2, 75.6)          | <b>-14.3y<br/>(-17.4, -11.2)</b> | -                     | -                              | -                                 | -0.7y<br>(-4.5, 3.2)       | -1.0y<br>(-3.3, 1.3)       |
|                         |                      | Difference <sup>c</sup> | 14.3y                 | 7.2y                          |                                  | 18.5y                 | 12.1y                         |                                  | 16.8y                 | 12.3y                          |                                  | -                     | -                              | -                                 |                            |                            |
|                         |                      | Ratio <sup>d</sup>      | 0.81                  | 0.91                          |                                  | 0.75                  | 0.86                          |                                  | 0.78                  | 0.86                           |                                  | -                     | -                              | -                                 |                            |                            |
|                         |                      | <b>Males</b>            | 64.3y<br>(61.9, 66.7) | 69.9y<br>(68.6, 71.3)         | <b>-5.7y<br/>(-8.4, -2.9)</b>    | 61.5y<br>(58.0, 65.0) | 70.0y<br>(68.4, 71.5)         | <b>-8.5y<br/>(-12.3, -4.7)</b>   | 59.7y<br>(56.8, 62.7) | 69.5y<br>(68.2, 70.9)          | <b>-9.8y<br/>(-13.0, -6.6)</b>   | -                     | -                              | -                                 | <b>-4.5y (-8.3, 0.8)</b>   | -0.4y<br>(-2.3, 1.6)       |
|                         |                      | Difference <sup>c</sup> | 6.4y                  | 7.2y                          |                                  | 12.1y                 | 9.3y                          |                                  | 13.6y                 | 11.2y                          |                                  | -                     | -                              | -                                 |                            |                            |
|                         | Ratio <sup>d</sup>   | 0.91                    | 0.91                  |                               | 0.84                             | 0.88                  |                               | 0.81                             | 0.86                  |                                | -                                | -                     | -                              |                                   |                            |                            |
|                         | Pain-Specific        | <b>Females</b>          | 64.1y<br>(60.6, 67.7) | 76.2y<br>(74.4, 78.0)         | <b>-12.1y<br/>(-16.0, -8.1)</b>  | 58.9y<br>(55.4, 62.4) | 75.5y<br>(73.7, 77.2)         | <b>-16.6y<br/>(-20.5, -12.7)</b> | 60.7y<br>(57.9, 63.4) | 79.5y<br>(78.2, 80.9)          | <b>-18.8y<br/>(-21.9, -15.8)</b> | -                     | -                              | -                                 | -3.5y (-7.9, 1.0)          | <b>3.3y<br/>(1.0, 5.6)</b> |
|                         |                      | Difference <sup>c</sup> | 10.4y                 | 5.9y                          |                                  | 16.1y                 | 8.1y                          |                                  | 15.7y                 | 6.6y                           |                                  | -                     | -                              | -                                 |                            |                            |
|                         |                      | Ratio <sup>d</sup>      | 0.86                  | 0.93                          |                                  | 0.79                  | 0.90                          |                                  | 0.79                  | 0.92                           |                                  | -                     | -                              | -                                 |                            |                            |
|                         |                      | <b>Males</b>            | 67.2y<br>(65.0, 69.4) | 71.7y<br>(69.7, 73.7)         | <b>-4.4y<br/>(-7.4, -1.5)</b>    | 63.0y<br>(59.7, 66.4) | 73.6y<br>(71.6, 75.5)         | <b>-10.5y<br/>(-14.4, -6.6)</b>  | 60.0y<br>(56.7, 63.3) | 77.4y<br>(76.3, 78.5)          | <b>-17.4y<br/>(-20.9, -13.9)</b> | -                     | -                              | -                                 | <b>-7.2y (-11.2, -3.3)</b> | <b>5.7y<br/>(3.4, 8.0)</b> |
|                         |                      | Difference <sup>c</sup> | 3.5y                  | 5.5y                          |                                  | 10.5y                 | 5.7y                          |                                  | 13.4y                 | 3.3y                           |                                  | -                     | -                              | -                                 |                            |                            |
|                         | Ratio <sup>d</sup>   | 0.95                    | 0.93                  |                               | 0.86                             | 0.93                  |                               | 0.82                             | 0.96                  |                                | -                                | -                     | -                              |                                   |                            |                            |
|                         | Emotional Well-Being | <b>Females</b>          | 73.0y<br>(71.6, 74.5) | 81.0y<br>(80.2, 81.9)         | <b>-8.0y<br/>(-9.6, -6.4)</b>    | 72.6y<br>(71.3, 73.8) | 81.0y<br>(80.1, 81.9)         | <b>-8.4y<br/>(-9.9, -6.9)</b>    | 74.4y<br>(73.2, 75.6) | 84.0y<br>(83.4, 84.7)          | <b>-9.6y<br/>(-11.0, -8.3)</b>   | -                     | -                              | -                                 | 1.4<br>(-0.5, 3.2)         | <b>3.0y<br/>(1.9, 4.0)</b> |
|                         |                      | Difference <sup>c</sup> | 1.5y                  | 1.1y                          |                                  | 2.5y                  | 2.6y                          |                                  | 1.9y                  | 2.1y                           |                                  | -                     | -                              | -                                 |                            |                            |
|                         |                      | Ratio <sup>d</sup>      | 0.98                  | 0.99                          |                                  | 0.97                  | 0.97                          |                                  | 0.97                  | 0.98                           |                                  | -                     | -                              | -                                 |                            |                            |
| <b>Males</b>            |                      | 69.3y<br>(67.6, 71.1)   | 76.2y<br>(75.4, 77.1) | <b>-6.9y<br/>(-8.8, -5.0)</b> | 70.1y<br>(67.7, 72.5)            | 77.2y<br>(76.3, 78.1) | <b>-7.1y<br/>(-9.6, -4.5)</b> | 70.3y<br>(68.8, 71.9)            | 76.9y<br>(75.8, 78.0) | <b>-6.6y<br/>(-8.5, -4.7)</b>  | -                                | -                     | -                              | 1.0y<br>(-1.4, 3.3)               | 0.7y<br>(-0.7, 2.1)        |                            |
| Difference <sup>c</sup> |                      | 1.4y                    | 1.0y                  |                               | 3.4y                             | 2.1y                  |                               | 3.0y                             | 3.8y                  |                                | -                                | -                     | -                              |                                   |                            |                            |
| Ratio <sup>d</sup>      | 0.98                 | 0.99                    |                       | 0.95                          | 0.97                             |                       | 0.96                          | 0.95                             |                       | -                              | -                                | -                     |                                |                                   |                            |                            |

<sup>a</sup> Health-adjusted life expectancy could not be calculated in 2011 as there was no corresponding Statistics Canada population health survey that included the Health Utility Index Mark 3 (HUI)

<sup>b</sup> Difference between 2011 and 1996 for life expectancy and difference between 2008 and 1996 for health-adjusted life expectancy.

<sup>c</sup>Difference between life expectancy and health-adjusted life expectancy

<sup>d</sup>Ratio of health-adjusted life expectancy to life expectancy

Abbreviations: CD, Crohn's disease; CI, confidence interval; y, years

**Table S5. Comparison of life expectancy and health-adjusted life expectancy among females and males with ulcerative colitis (UC) and matched people without UC. Significant differences are highlighted in bold font.**

|                         |                         | 1996                    |                       |                                     | 2000                                 |                       |                                     | 2008                                  |                       |                                     | 2011 <sup>a</sup>                   |                       |                                     | Difference Over Time <sup>b</sup> |                                  |                      |
|-------------------------|-------------------------|-------------------------|-----------------------|-------------------------------------|--------------------------------------|-----------------------|-------------------------------------|---------------------------------------|-----------------------|-------------------------------------|-------------------------------------|-----------------------|-------------------------------------|-----------------------------------|----------------------------------|----------------------|
|                         |                         | UC                      | Non-UC                | Difference                          | UC                                   | Non-UC                | Difference                          | UC                                    | Non-UC                | Difference                          | UC                                  | Non-UC                | Difference                          | UC                                | Non-UC                           |                      |
| LE (95% CI)             | <b>Females</b>          | 77.6y<br>(74.8, 80.4)   | 82.1y<br>(81.6, 82.7) | <b>-4.5y</b><br><b>(-7.4, -1.7)</b> | 78.7y<br>(77.4, 80.0)                | 83.7y<br>(83.2, 84.2) | <b>-5.1y</b><br><b>(-6.5, -3.7)</b> | 79.8y<br>(78.3, 81.3)                 | 86.0y<br>(85.5, 86.5) | <b>-6.2y</b><br><b>(-7.8, -4.7)</b> | 80.5y<br>(79.7, 81.4)               | 86.3y<br>(86.0, 86.7) | <b>-5.8y</b><br><b>(-6.7, -4.8)</b> | 3.0y<br>(-0.001, 5.9)             | <b>4.2y</b><br><b>(3.5, 4.8)</b> |                      |
|                         | <b>Males</b>            | 73.6y<br>(72.0, 75.1)   | 77.9y<br>(77.3, 78.4) | <b>-4.3y</b><br><b>(-5.9, -2.7)</b> | 75.3y<br>(74.4, 76.3)                | 79.5y<br>(79.0, 80.1) | <b>-4.2y</b><br><b>(-5.3, -3.1)</b> | 76.7y<br>(75.9, 77.5)                 | 81.4y<br>(81.0, 81.9) | <b>-4.7y</b><br><b>(-5.6, -3.8)</b> | 76.7y<br>(75.5, 77.9)               | 81.4y<br>(80.6, 82.2) | <b>-4.7y</b><br><b>(-6.1, -3.3)</b> | <b>3.1y</b><br><b>(1.2, 5.1)</b>  | <b>3.5y</b><br><b>(2.6, 4.5)</b> |                      |
| HALE (95% CI)           | Overall                 | <b>Females</b>          | 70.3y<br>(66.9, 73.7) | 74.5y<br>(72.9, 76.2)               | <b>-4.2y</b><br><b>(-8.0, -0.4)</b>  | 69.9y<br>(67.4, 72.5) | 72.4y<br>(70.2, 74.5)               | -2.4y<br>(-5.8, 0.9)                  | 71.2y<br>(68.5, 73.8) | 75.9y<br>(74.9, 76.9)               | <b>-4.7y</b><br><b>(-7.5, -1.9)</b> | -                     | -                                   | -                                 | 0.8y<br>(-3.5, 5.1)              | 1.4y<br>(-0.6, 3.3)  |
|                         |                         | Difference <sup>c</sup> | 7.3y                  | 7.6y                                |                                      | 8.7y                  | 11.4y                               |                                       | 8.6y                  | 10.1y                               |                                     | -                     | -                                   | -                                 |                                  |                      |
|                         |                         | Ratio <sup>d</sup>      | 0.91                  | 0.91                                |                                      | 0.89                  | 0.86                                |                                       | 0.89                  | 0.88                                |                                     | -                     | -                                   | -                                 |                                  |                      |
|                         |                         | <b>Males</b>            | 68.8y<br>(66.2, 71.4) | 70.3y<br>(68.7, 71.9)               | -1.5y<br>(-4.5, 1.6)                 | 67.6y<br>(65.4, 69.9) | 74.5y<br>(73.5, 75.5)               | <b>-6.8y</b><br><b>(-9.3, -4.4)</b>   | 67.8y<br>(65.8, 69.8) | 70.9y<br>(68.3, 73.4)               | -3.0y<br>(-6.3, 0.2)                | -                     | -                                   | -                                 | -1.0y<br>(-4.2, 2.3)             | 0.6y<br>(-2.4, 3.6)  |
|                         |                         | Difference <sup>c</sup> | 4.8y                  | 7.6y                                |                                      | 7.7y                  | 5.0y                                |                                       | 8.9y                  | 10.6y                               |                                     | -                     | -                                   | -                                 |                                  |                      |
|                         | Ratio <sup>d</sup>      | 0.94                    | 0.90                  |                                     | 0.90                                 | 0.94                  |                                     | 0.88                                  | 0.87                  |                                     | -                                   | -                     | -                                   |                                   |                                  |                      |
|                         | Pain-Specific           | <b>Females</b>          | 74.7y<br>(70.9, 78.4) | 79.4y<br>(78.3, 80.5)               | <b>-4.7y</b><br><b>(-8.6, -0.8)</b>  | 71.0y<br>(68.1, 73.9) | 76.7y<br>(74.5, 78.8)               | <b>-5.7y</b><br><b>(-9.3, -2.1)</b>   | 73.4y<br>(70.3, 76.4) | 79.9y<br>(78.7, 81.1)               | <b>-6.6y</b><br><b>(-9.8, -3.3)</b> | -                     | -                                   | -                                 | -1.3y<br>(-6.1, 3.5)             | 0.5y<br>(-1.1, 2.2)  |
|                         |                         | Difference <sup>c</sup> | 2.9y                  | 2.7y                                |                                      | 7.7y                  | 7.1y                                |                                       | 6.4y                  | 6.1y                                |                                     | -                     | -                                   | -                                 |                                  |                      |
|                         |                         | Ratio <sup>d</sup>      | 0.96                  | 0.97                                |                                      | 0.90                  | 0.92                                |                                       | 0.92                  | 0.93                                |                                     | -                     | -                                   | -                                 |                                  |                      |
|                         |                         | <b>Males</b>            | 68.2y<br>(64.7, 71.6) | 75.7y<br>(74.7, 76.7)               | <b>-7.5y</b><br><b>(-11.1, -3.9)</b> | 67.1y<br>(63.9, 70.4) | 77.8y<br>(76.8, 78.7)               | <b>-10.6y</b><br><b>(-14.0, -7.3)</b> | 72.7y<br>(70.4, 75.1) | 74.4y<br>(72.4, 76.5)               | -1.7y<br>(-4.8, 1.4)                | -                     | -                                   | -                                 | <b>4.5y</b><br><b>(0.4, 8.7)</b> | -1.3y<br>(-3.5, 1.0) |
| Difference <sup>c</sup> |                         | 5.4y                    | 2.2y                  |                                     | 8.2y                                 | 1.8y                  |                                     | 4.0y                                  | 7.0y                  |                                     | -                                   | -                     | -                                   |                                   |                                  |                      |
| Ratio <sup>d</sup>      | 0.93                    | 0.97                    |                       | 0.89                                | 0.98                                 |                       | 0.95                                | 0.91                                  |                       | -                                   | -                                   | -                     |                                     |                                   |                                  |                      |
| Emotional Well-Being    | <b>Females</b>          | 77.2y<br>(74.3, 80.0)   | 81.1y<br>(80.4, 81.8) | <b>-3.9y</b><br><b>(-6.8, -0.9)</b> | 77.3y<br>(75.8, 78.8)                | 80.3y<br>(78.9, 81.7) | <b>-3.0y</b><br><b>(-5.0, -1.0)</b> | 78.5y<br>(76.9, 80.1)                 | 83.8y<br>(83.1, 84.5) | <b>-5.3y</b><br><b>(-7.1, -3.6)</b> | -                                   | -                     | -                                   | 1.3y<br>(-2.0, 4.5)               | <b>2.7y</b><br><b>(1.7, 3.7)</b> |                      |
|                         | Difference <sup>c</sup> | 0.4y                    | 1.1y                  |                                     | 1.4y                                 | 3.4y                  |                                     | 1.3y                                  | 2.2y                  |                                     | -                                   | -                     | -                                   |                                   |                                  |                      |
|                         | Ratio <sup>d</sup>      | 0.99                    | 0.99                  |                                     | 0.98                                 | 0.96                  |                                     | 0.98                                  | 0.97                  |                                     | -                                   | -                     | -                                   |                                   |                                  |                      |
|                         | <b>Males</b>            | 73.2y<br>(71.7, 74.8)   | 75.8y<br>(74.6, 77.1) | <b>-2.6y</b><br><b>(-4.6, -0.6)</b> | 75.0y<br>(74.1, 76.0)                | 78.3y<br>(77.6, 79.0) | <b>-3.3y</b><br><b>(-4.5, -2.1)</b> | 75.0y<br>(73.9, 76.1)                 | 79.8y<br>(79.1, 80.4) | <b>-4.8y</b><br><b>(-6.1, -3.5)</b> | -                                   | -                     | -                                   | 1.8y<br>(-0.1, 3.7)               | <b>4.0y</b><br><b>(2.5, 5.4)</b> |                      |
|                         | Difference <sup>c</sup> | 0.3y                    | 2.1y                  |                                     | 0.3y                                 | 1.2y                  |                                     | 1.7y                                  | 1.6y                  |                                     | -                                   | -                     | -                                   |                                   |                                  |                      |
| Ratio <sup>d</sup>      | 1.00                    | 0.97                    |                       | 1.00                                | 0.98                                 |                       | 0.98                                | 0.98                                  |                       | -                                   | -                                   | -                     |                                     |                                   |                                  |                      |

<sup>a</sup>Health-adjusted life expectancy could not be calculated in 2011 as there was no corresponding Statistics Canada population health survey that included the Health Utility Index Mark 3 (HUI)

<sup>b</sup>Difference between 2011 and 1996 for life expectancy and difference between 2008 and 1996 for health-adjusted life expectancy.

<sup>c</sup>Difference between life expectancy and health-adjusted life expectancy

<sup>d</sup>Ratio of health-adjusted life expectancy to life expectancy

Abbreviations: CI, confidence interval; UC, ulcerative colitis; y, years



**Table S6. Comparison of five-year mortality rates in people with inflammatory bowel disease (IBD) and people without IBD. Significant associations are highlighted in bold font.**

| Sex     | 1996                                |                      | 2000                                |                         | 2008                                |                                    | 2011                                |                                    |                         |                      |                                    |
|---------|-------------------------------------|----------------------|-------------------------------------|-------------------------|-------------------------------------|------------------------------------|-------------------------------------|------------------------------------|-------------------------|----------------------|------------------------------------|
|         | Mortality Rate Per 1000 py (95% CI) |                      | Mortality Rate Per 1000 py (95% CI) |                         | Mortality Rate Per 1000 py (95% CI) |                                    | Mortality Rate Per 1000 py (95% CI) |                                    |                         |                      |                                    |
|         | IBD                                 | Non-IBD              | IBD                                 | Non-IBD                 | IBD                                 | Non-IBD                            | IBD                                 | Non-IBD                            |                         |                      |                                    |
| Females | 7.67<br>(7.08, 8.28)                | 4.74<br>(4.53, 4.97) | <b>1.62</b><br><b>(1.48, 1.77)</b>  | 4.90<br>(4.71, 5.09)    | <b>1.82</b><br><b>(1.69, 1.95)</b>  | 10.03<br>(9.57, 10.51)             | 5.01<br>(4.85, 5.17)                | <b>2.00</b><br><b>(1.89, 2.12)</b> | 10.05<br>(9.62, 10.50)  | 5.07<br>(4.92, 5.21) | <b>1.98</b><br><b>(1.88, 2.09)</b> |
| Males   | 10.61<br>(9.89, 11.38)              | 7.24<br>(6.95, 7.53) | <b>1.47</b><br><b>(1.35, 1.59)</b>  | 6.91<br>(6.67, 7.15)    | <b>1.42</b><br><b>(1.32, 1.53)</b>  | 10.99<br>(10.48, 11.52)            | 7.31<br>(7.12, 7.52)                | <b>1.50</b><br><b>(1.42, 1.59)</b> | 11.26<br>(10.78, 11.76) | 7.03<br>(6.85, 7.21) | <b>1.60</b><br><b>(1.52, 1.68)</b> |
|         | CD                                  | Non-CD               | CD                                  | Non-CD                  | CD                                  | Non-CD                             | CD                                  | Non-CD                             |                         |                      |                                    |
| Females | 7.87<br>(7.10, 8.72)                | 4.00<br>(3.73, 4.28) | <b>1.97</b><br><b>(1.74, 2.23)</b>  | 4.18<br>(3.94, 4.42)    | <b>2.03</b><br><b>(1.83, 2.25)</b>  | 9.70<br>(9.07, 10.38)              | 4.16<br>(3.96, 4.37)                | <b>2.33</b><br><b>(2.15, 2.53)</b> | 10.00<br>(9.40, 10.65)  | 4.33<br>(4.14, 4.52) | <b>2.31</b><br><b>(2.14, 2.50)</b> |
| Males   | 8.87<br>(7.93, 9.92)                | 5.43<br>(5.08, 5.81) | <b>1.63</b><br><b>(1.43, 1.86)</b>  | 5.31<br>(5.01, 5.62)    | <b>1.48</b><br><b>(1.32, 1.67)</b>  | 9.72<br>(9.03, 10.47)              | 5.77<br>(5.51, 6.04)                | <b>1.69</b><br><b>(1.54, 1.84)</b> | 10.05<br>(9.39, 10.76)  | 5.65<br>(5.42, 5.90) | <b>1.78</b><br><b>(1.64, 1.93)</b> |
|         | UC                                  | Non-UC               | UC                                  | Non-UC                  | UC                                  | Non-UC                             | UC                                  | Non-UC                             |                         |                      |                                    |
| Females | 6.86<br>(6.05, 7.78)                | 5.52<br>(5.17, 5.90) | <b>1.24</b><br><b>(1.08, 1.43)</b>  | 5.63<br>(5.33, 5.94)    | <b>1.54</b><br><b>(1.38, 1.72)</b>  | 9.85<br>(9.19, 10.56)              | 5.80<br>(5.55, 6.05)                | <b>1.70</b><br><b>(1.57, 1.84)</b> | 9.98<br>(9.36, 10.65)   | 5.79<br>(5.57, 6.02) | <b>1.72</b><br><b>(1.60, 1.86)</b> |
| Males   | 11.43<br>(10.40, 12.56)             | 8.81<br>(8.37, 9.27) | <b>1.30</b><br><b>(1.17, 1.45)</b>  | 11.34<br>(10.45, 12.30) | 8.38<br>(8.02, 8.76)                | <b>1.35</b><br><b>(1.23, 1.48)</b> | 11.91<br>(11.17, 12.68)             | 8.62<br>(8.32, 8.93)               | 12.34<br>(11.65, 13.08) | 8.32<br>(8.05, 8.60) | <b>1.48</b><br><b>(1.39, 1.59)</b> |

Abbreviations: CI, confidence interval; IBD, inflammatory bowel disease; py, person years; RR, relative risk

**Table S7. Mean Health Utility Index Mark 3 (HUI) and 95% confidence interval (CI) in people with IBD and matched people without IBD.**

| Sex                                           | NPHS (1996)      |                  | CCHS 1.1 (2000)  |                  | CCHS 2009/2010 (2008) |                  |
|-----------------------------------------------|------------------|------------------|------------------|------------------|-----------------------|------------------|
| <b>Overall HUI</b>                            |                  |                  |                  |                  |                       |                  |
|                                               | <b>IBD</b>       | <b>Non-IBD</b>   | <b>IBD</b>       | <b>Non-IBD</b>   | <b>IBD</b>            | <b>Non-IBD</b>   |
| Females                                       | 0.82 (0.75-0.90) | 0.91 (0.89-0.94) | 0.73 (0.63-0.82) | 0.87 (0.84-0.89) | 0.79 (0.71-0.86)      | 0.84 (0.81-0.88) |
| Males                                         | 0.91 (0.87-0.96) | 0.90 (0.88-0.93) | 0.88 (0.83-0.92) | 0.89 (0.87-0.92) | 0.79 (0.72-0.86)      | 0.85 (0.82-0.87) |
|                                               | <b>CD</b>        | <b>Non-CD</b>    | <b>CD</b>        | <b>Non-CD</b>    | <b>CD</b>             | <b>Non-CD</b>    |
| Females                                       | 0.80 (0.70-0.89) | 0.91 (0.87-0.95) | 0.71 (0.59-0.83) | 0.89 (0.86-0.92) | 0.75 (0.66-0.84)      | 0.83 (0.77-0.89) |
| Males                                         | 0.88 (0.80-0.96) | 0.92 (0.89-0.95) | 0.86 (0.79-0.93) | 0.87 (0.83-0.91) | 0.76 (0.65-0.88)      | 0.85 (0.81-0.89) |
|                                               | <b>UC</b>        | <b>Non-UC</b>    | <b>UC</b>        | <b>Non-UC</b>    | <b>UC</b>             | <b>Non-UC</b>    |
| Females                                       | 0.88 (0.77-0.99) | 0.92 (0.89-0.95) | 0.79 (0.67-0.91) | 0.83 (0.76-0.89) | 0.85 (0.75-0.94)      | 0.87 (0.84-0.89) |
| Males                                         | 0.92 (0.87-0.97) | 0.90 (0.87-0.94) | 0.90 (0.85-0.96) | 0.93 (0.90-0.95) | 0.82 (0.73-0.90)      | 0.84 (0.80-0.89) |
| <b>HUI attributed to pain</b>                 |                  |                  |                  |                  |                       |                  |
|                                               | <b>IBD</b>       | <b>Non-IBD</b>   | <b>IBD</b>       | <b>Non-IBD</b>   | <b>IBD</b>            | <b>Non-IBD</b>   |
| Females                                       | 0.84 (0.74-0.95) | 0.94 (0.91-0.97) | 0.76 (0.64-0.88) | 0.92 (0.89-0.95) | 0.79 (0.68-0.90)      | 0.91 (0.88-0.93) |
| Males                                         | 0.93 (0.88-0.98) | 0.96 (0.94-0.98) | 0.89 (0.84-0.95) | 0.94 (0.91-0.98) | 0.84 (0.75-0.93)      | 0.91 (0.88-0.94) |
|                                               | <b>CD</b>        | <b>Non-CD</b>    | <b>CD</b>        | <b>Non-CD</b>    | <b>CD</b>             | <b>Non-CD</b>    |
| Females                                       | 0.83 (0.73-0.94) | 0.92 (0.87-0.97) | 0.73 (0.58-0.89) | 0.93 (0.89-0.96) | 0.73 (0.59-0.88)      | 0.90 (0.87-0.94) |
| Males                                         | 0.93 (0.86-1.01) | 0.96 (0.92-0.99) | 0.88 (0.80-0.95) | 0.92 (0.86-0.97) | 0.77 (0.62-0.91)      | 0.94 (0.90-0.97) |
|                                               | <b>UC</b>        | <b>Non-UC</b>    | <b>UC</b>        | <b>Non-UC</b>    | <b>UC</b>             | <b>Non-UC</b>    |
| Females                                       | 0.90 (0.74-1.06) | 0.96 (0.93-0.98) | 0.82 (0.69-0.95) | 0.90 (0.86-0.95) | 0.88 (0.77-1.00)      | 0.92 (0.89-0.95) |
| Males                                         | 0.92 (0.85-0.99) | 0.97 (0.95-0.99) | 0.92 (0.83-1.00) | 0.98 (0.97-0.99) | 0.92 (0.84-1.01)      | 0.88 (0.82-0.95) |
| <b>HUI attributed to emotional well-being</b> |                  |                  |                  |                  |                       |                  |
|                                               | <b>IBD</b>       | <b>Non-IBD</b>   | <b>IBD</b>       | <b>Non-IBD</b>   | <b>IBD</b>            | <b>Non-IBD</b>   |
| Females                                       | 0.99 (0.98-0.99) | 0.98 (0.98-0.99) | 0.96 (0.94-0.97) | 0.96 (0.95-0.98) | 0.98 (0.97-0.99)      | 0.97 (0.96-0.98) |
| Males                                         | 0.98 (0.97-1.00) | 0.98 (0.96-0.99) | 0.97 (0.94-0.99) | 0.97 (0.96-0.98) | 0.95 (0.93-0.98)      | 0.96 (0.95-0.97) |
|                                               | <b>CD</b>        | <b>Non-CD</b>    | <b>CD</b>        | <b>Non-CD</b>    | <b>CD</b>             | <b>Non-CD</b>    |
| Females                                       | 0.98 (0.96-0.99) | 0.99 (0.98-1.00) | 0.95 (0.93-0.98) | 0.97 (0.96-0.98) | 0.98 (0.97-1.00)      | 0.97 (0.96-0.98) |
| Males                                         | 0.97 (0.94-1.00) | 0.99 (0.98-1.00) | 0.95 (0.91-0.99) | 0.97 (0.95-0.98) | 0.95 (0.91-0.98)      | 0.96 (0.94-0.98) |
|                                               | <b>UC</b>        | <b>Non-UC</b>    | <b>UC</b>        | <b>Non-UC</b>    | <b>UC</b>             | <b>Non-UC</b>    |
| Females                                       | 0.99 (0.98-1.00) | 0.98 (0.97-1.00) | 0.96 (0.92-0.99) | 0.94 (0.90-0.98) | 0.98 (0.96-1.00)      | 0.97 (0.96-0.98) |
| Males                                         | 0.99 (0.98-1.01) | 0.97 (0.95-0.99) | 0.99 (0.99-1.00) | 0.97 (0.95-0.99) | 0.96 (0.92-1.00)      | 0.97 (0.95-0.99) |

Abbreviations: CCHS, Canadian Community Health Survey; CD, Crohn's disease; CI, confidence interval; IBD, inflammatory bowel disease; NPHS, National Population Health Survey; UC, ulcerative colitis

**Figure S1. Life expectancy and health-adjusted life expectancy in people with Crohn's disease (CD) and matched people without CD.**

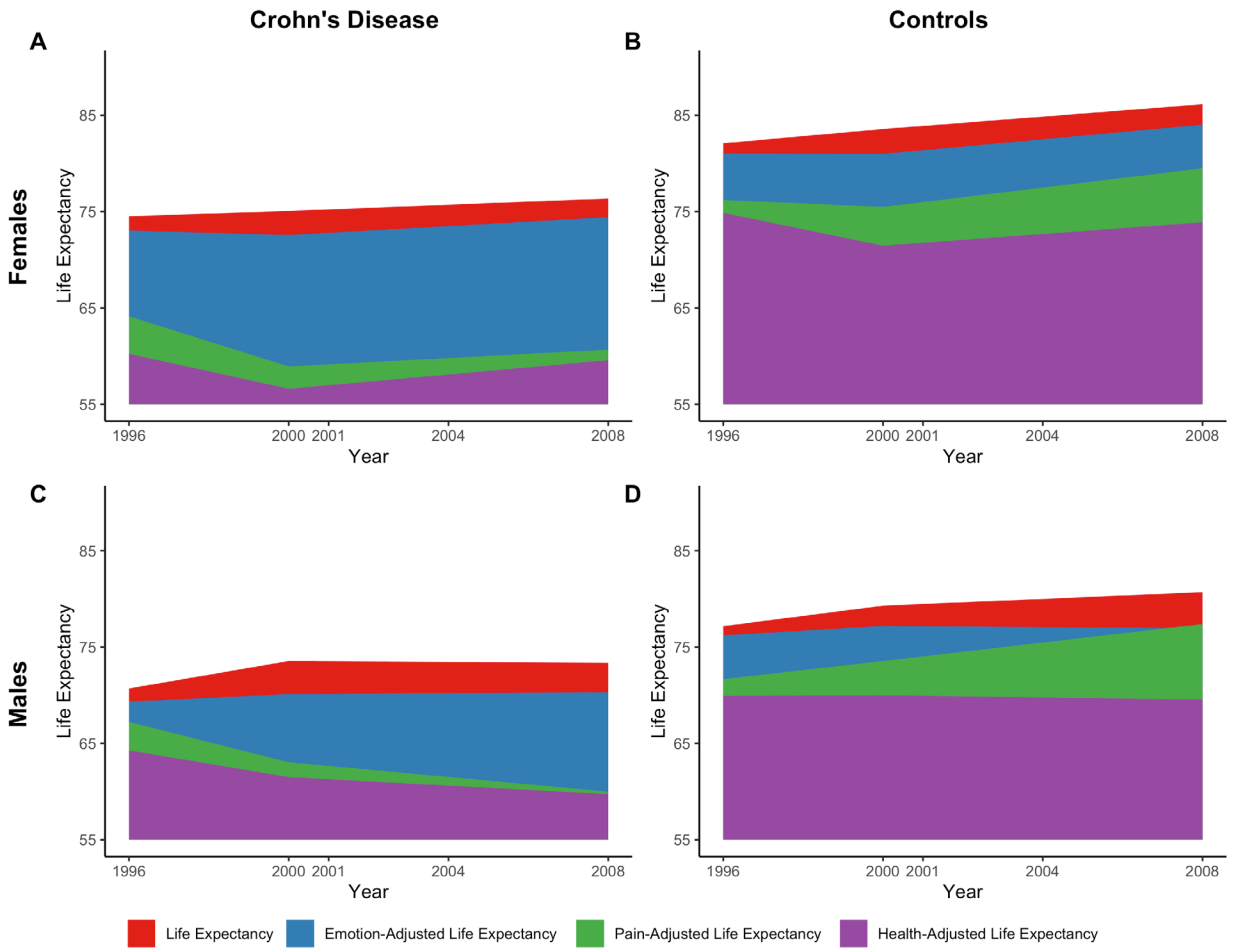

**Figure S2. Life expectancy and health-adjusted life expectancy in people with ulcerative colitis (UC) and matched people without UC.**

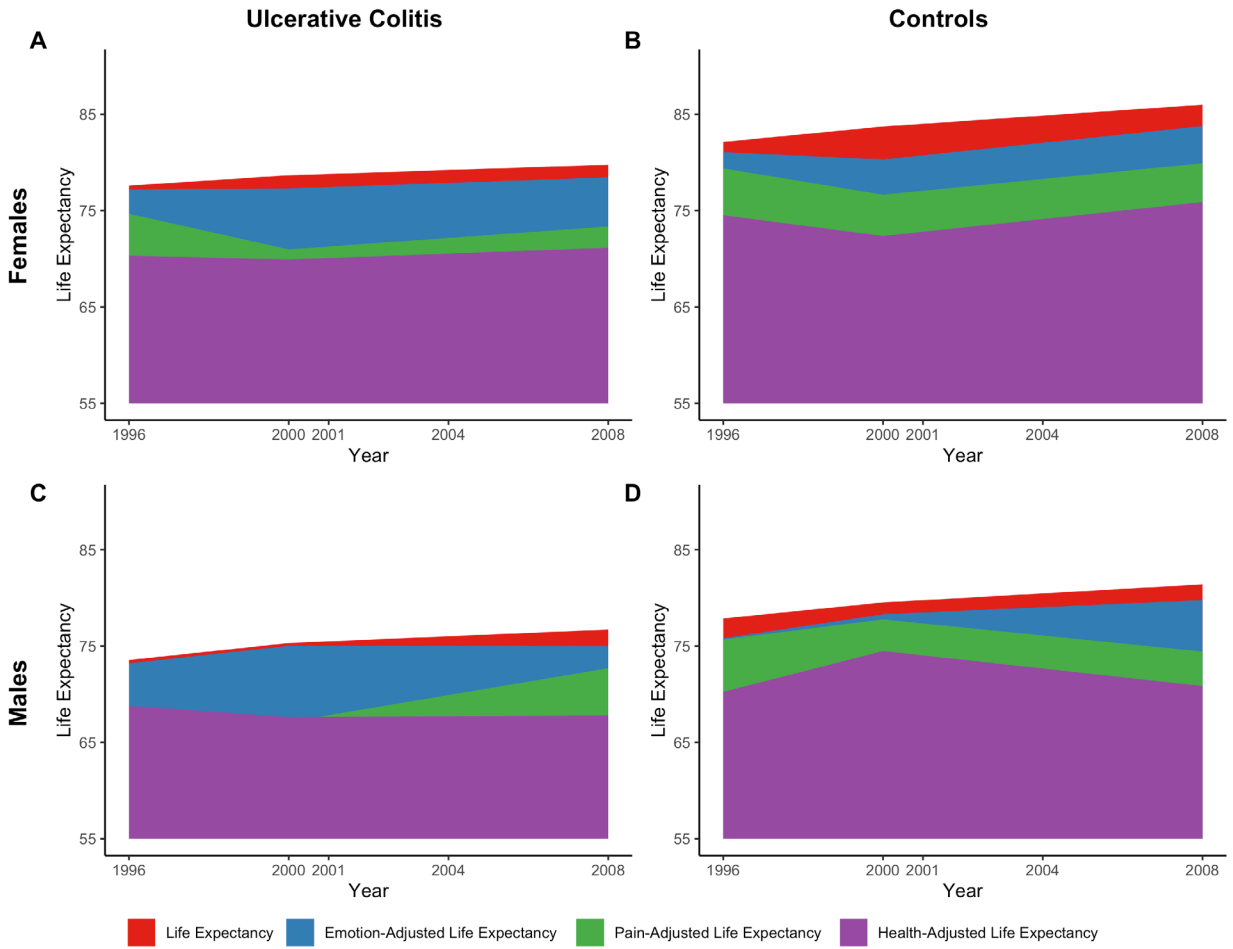

## References

1. Benchimol EI, Guttman A, Griffiths AM, Rabeneck L, Mack DR, Brill H, et al. Increasing incidence of paediatric inflammatory bowel disease in Ontario, Canada: evidence from health administrative data. *Gut*. 2009 Oct 15;58(11):1490–7.
2. Benchimol EI, Guttman A, Mack DR, Nguyen GC, Marshall JK, Gregor JC, et al. Validation of international algorithms to identify adults with inflammatory bowel disease in health administrative data from Ontario, Canada. *J Clin Epidemiol*. Elsevier Inc; 2014 Aug 1;67(8):887–96.
